1  
2  
3  
4  
5  
6  
7  
8  
9  
10  
11  
12  
13  
14  
15  
16  
17  
18  
19  
20  
21  
22  
23  
24  
25  
26  
27  
28  
29  
30  
31  
32  
33  
34  
35  
36

## Numerous cultivated and uncultivated viruses encode ribosomal proteins

Carolina M. Mizuno<sup>1#</sup>, Charlotte Guyomar<sup>2#</sup>, Simon Roux<sup>3</sup>, Régis Lavigne<sup>4</sup>, Francisco Rodriguez-Valera<sup>5</sup>, Matthew B. Sullivan<sup>6,7</sup>, Reynald Gillet<sup>2</sup>, Patrick Forterre<sup>1</sup>, Mart Krupovic<sup>1\*</sup>

<sup>1</sup> – Unité de Biologie Moléculaire du Gène chez les Extrêmophiles, Département de Microbiologie, Institut Pasteur, Paris, France

<sup>2</sup> – Université Rennes, CNRS, UBL, Institut de Génétique et Développement de Rennes (IGDR) - UMR 6290 -F35042 Rennes France

<sup>3</sup> – Department of Energy Joint Genome Institute, Walnut Creek, CA 94598, USA

<sup>4</sup> – Inserm U1085 IRSET, Université de Rennes 1, 35000 Rennes, France; Protim, 35042 Rennes, France.

<sup>5</sup> – Departamento de Producción Vegetal y Microbiología, Evolutionary Genomics Group, Universidad Miguel Hernandez, Alicante, Spain

<sup>6</sup> – Department of Microbiology, The Ohio State University, Columbus, OH 43210, United States

<sup>7</sup> – Department of Civil, Environmental and Geodetic Engineering, The Ohio State University, Columbus, OH 43210, United States

# – Equal contribution.

\* – To whom correspondence should be addressed. Email: [krupovic@pasteur.fr](mailto:krupovic@pasteur.fr)

37 **Text**

38 Viruses modulate ecosystems by directly altering host metabolisms through auxiliary metabolic genes,  
39 which are obtained through random ‘sampling’ of the host genome and rise to fixation, presumably  
40 through improved viral fitness by alleviating key metabolic bottlenecks during infection. Conspicuously,  
41 however, viral genomes are not known to encode the core components of translation machinery, such  
42 as ribosomal proteins (RPs), though genes for RPs S1 and S21 have been detected in viral  
43 metagenomes<sup>1,2</sup>. Here we augment this little-noticed observation using available reference genomes,  
44 global-scale viral metagenomic datasets, and functional assays for select proteins. We identify 15  
45 different RPs across diverse viral genomes arising from cultivated viral isolates (5 RPs in 16 genomes)  
46 and metagenome-assembled viruses (14 RPs in 1,403 uncultivated virus genomes). Among these, S21  
47 and L7/L12 are the most common, and functional assays show that both proteins are incorporated into  
48 70S ribosomes when expressed in *Escherichia coli*, indicating that they might modulate protein  
49 translation during infection. Ecological distributions of virus-encoded RPs suggest ecosystem-specific  
50 virus adaptations, whereby aquatic viruses appear to selectively incorporate genes for S21, L31 and L33,  
51 whereas S6, S9, S15 and S30AE genes are enriched among viruses infecting animal-associated bacteria.  
52 Finally, the fact that viruses tend to encode dynamic RPs, suggests that the viral proteins likely replace  
53 cellular versions in host ribosomes, likely enabling takeover of host translational machinery.

54  
55 During billions of years of co-evolution with their hosts, viruses have evolved numerous strategies  
56 ensuring their successful propagation, including tinkering with various metabolic pathways and  
57 subversion of key cellular biosynthetic machineries. For example, ocean viruses that infect  
58 cyanobacteria (cyanophages) commonly encode core photosynthetic reaction center proteins, which  
59 serve to maintain the complex photosynthetic machinery during infection<sup>3</sup>. These and other ocean  
60 viruses can similarly manipulate their host’s ability to uptake phosphate<sup>4</sup>, as well as cycle nitrogen<sup>5,6</sup> and  
61 sulfur<sup>7,8</sup> – the fundamental building blocks of ocean life. Complementarily, viruses employ a diverse  
62 array of host take-over strategies to (i) fight off host defenses by encoding anti-restriction-modification  
63 or anti-CRISPR genes<sup>9</sup>, and (ii) control transcription by encoding sigma factors or polymerases  
64 themselves<sup>10</sup>. Conspicuously not yet observed in viral genomes, however, are the RPs. Indeed, even the  
65 giant mimiviruses, which are known to carry genes for a range of aminoacyl-tRNA synthetases<sup>11,12</sup>, do  
66 not encode proteins directly participating in the formation of the ribosomes. It is this feature –  
67 ribosome-encoding or not – which is now proposed to separate cellular life from viruses<sup>13,14</sup>.

68  
69 The first crossing of this line appeared when previous analysis of ‘cleaned’ viral metagenomes suggested  
70 that viral genomes might encode ribosomal proteins after all – specifically for S1 and S21 (REF 1,2).

71 While intriguing, these observations went largely unnoticed, likely because they were based on short  
72 assemblies lacking genome context. To systematically investigate this, we first searched available  
73 reference genomes of cultivated viruses for genes encoding RPs. Of 116 ribosomal protein domains  
74 (Table S1) that seeded our searches, 5 were identified across 16 viral genomes (Table 1). The genes were  
75 generally embedded within variable genomic contexts, even for homologous ribosomal protein genes  
76 (Figure S1).

77 We identified a ribosomal protein S30 domain, a component of the small 40S ribosomal subunit<sup>15</sup>, in the  
78 eukaryotic virus, Finkel-Biskis-Reilly murine sarcoma virus (FBR-MuSV), a member of the family  
79 *Retroviridae*. This domain was part of the *fau* gene fused to an N-terminal ubiquitin-like domain (Figure  
80 S2a). Interestingly, FBR-MuSV has acquired the cDNA copy of *fau* in inverse orientation, and production  
81 of the antisense RNA suppresses expression of endogenous *fau* mRNA, which leads to apoptosis  
82 inhibition and induces tumorigenesis<sup>15,16</sup>. Although the viral protein is not translated<sup>15</sup>, the antisense

83 transcript affects the production of the cellular *fau*<sup>16</sup> and thus might have an indirect effect on the  
84 ribosome biogenesis.

85

86 The remainder of the virus-encoded ribosomal proteins – S21, L9, L7/L12 and S30AE – was found in  
87 bacterial viruses (bacteriophages) infecting proteobacterial (from 3 different classes) and mycobacterial  
88 (phylum Actinobacteria) hosts (Table 1). The S21 homolog was identified in pelagiphage HTVC008M, a  
89 myovirus. S21 is a conserved component of the bacterial 30S ribosomal subunit (Figure 1a) required for  
90 the initiation of polypeptide synthesis and mediates the base-pairing reaction between mRNA and 16S  
91 rRNA<sup>17</sup>. The viral protein was most similar (54% identity over the protein length) to the corresponding  
92 protein of its host, *Pelagibacter ubique* (Figure 1b), an abundant member of the SAR11 clade (class  
93 Alphaproteobacteria), which is considered to represent one of the most numerous bacterial groups  
94 worldwide<sup>18</sup>. Maximum likelihood phylogenetic analysis strongly suggests that the phage gene was  
95 horizontally acquired from the *Pelagibacter* host (Figure 1c).

96

97 Ribosomal protein L9 was identified in *Mycobacterium* phage 32HC, a siphovirus. L9 binds to the 23S  
98 rRNA and is a component of the large 50S ribosome subunit (Figure S3A). The protein is involved in  
99 translation fidelity and is required to suppress bypassing, frameshifting, and stop codon "hopping"<sup>19</sup>. L9  
100 has a highly conserved architecture consisting of two widely spaced globular domains connected by an  
101 elongated  $\alpha$ -helix<sup>20</sup>. While the viral L9 homolog contains the N-terminal globular domain and part of the  
102  $\alpha$ -helical spacer, the C-terminal part has been apparently non-homologously replaced with sequence  
103 that lacks known function (Figure S2b).

104

105 The next ribosomal protein encoded in sequenced viral genomes was L7/L12, which was found in 7  
106 phages infecting proteobacteria from 3 different classes (Table 1). L7 is equivalent to L12 except for the  
107 acetylation at the N-terminus, hence the two proteins are often collectively referred to as L7/L12<sup>21</sup>. The  
108 L7/L12 proteins participate in the formation of the so-called L7/L12 stalk, a clearly defined  
109 morphological feature in the *E. coli* 50S ribosomal subunit, which besides L7/L12, contains ribosomal  
110 proteins L10 and L11 as well as the L10- and L11-binding region of the 23S rRNA<sup>21</sup> (Figure S3A). The  
111 phage-encoded L7/L12 domains are similar (~50%) to *bona fide* cellular ribosomal homologs, as well as  
112 conserved residues involved in interaction with L11 and elongation factors EF-G and EF-Tu (Figure S4a).  
113 Although in some phages (e.g., *Ralstonia* phage RSB3), the L7/L12 domain spans the entire protein, it  
114 was more common that these domains were variably positioned within much larger polypeptides (up to  
115 724 aa-long; Figure S4b). Interestingly, searches seeded with sequences flanking the L7/L12 domain in  
116 phage proteins resulted in identification of multiple phage homologs which specifically lack the L7/L12  
117 domain (Figure S5). For example, proteins encoded by *Salmonella* phages FSL\_SP-058 and FSL\_SP-076  
118 contain the L7/L12 domains, whereas homologous protein from *Escherichia* phage Pollock lacks this  
119 domain, despite conservation of the upstream and downstream regions (Figure S5). Furthermore, in  
120 different phage genomes, L7/L12 proteins were encoded within widely different genomic contexts  
121 (Figure S1). These observations suggest that L7/L12 domain has been acquired by different phages on  
122 multiple, independent occasions, with some of these genes possibly being fixed in the phage genomes.

123

124 The last ribosomal protein encoded in sequenced viral genomes were S30AE domain-containing  
125 proteins, which were encoded by 7 phages infecting *Cronobacter* and *E. coli* (six closely related phages  
126 with 92-97% average nucleotide identity) (Figure S6). S30AE proteins are expressed during stasis and  
127 under unfavorable growth conditions. S30AE proteins binds ribosomes to stabilize 100S dimers that  
128 inhibit translation to enable cells to control translational activity without costly alteration of the  
129 ribosomal pool<sup>22</sup>. Multiple sequence alignment shows high conservation of the viral and cellular S30AE  
130 homologs (Figure S7), suggesting that the gene transfer has occurred in a relatively recent past. In the

131 S30AE phylogeny, homologs from *E. coli* phages cluster amidst gammaproteobacterial sequences. By  
132 contrast, the more divergent protein encoded by *Cronobacter* phage clusters with sequences from  
133 members of the phylum Firmicutes, though this association is confounded by potential long-branch-  
134 attraction artifact (Figure S8).

135  
136 To place these findings of cultivated virus-encoded RPs into broader ecological context, we searched  
137 424,225 viral contigs from two global viral metagenomic datasets<sup>8,23</sup> for putative RPs using the same 106  
138 sequence profiles (see Materials and Methods). Overall, 14 putative ribosomal protein genes were  
139 identified across 1,403 contigs (Figure 2, Table S2, Figure S3B). S21, L7/L12 and S30AE, which were  
140 found in cultivated phages, were also detected in uncultivated phages, with S21 homologs dominating  
141 (88%) the pool of RPs detected (Figure 2, Table S2). While found in only one cultivated phage (see  
142 above), maximum likelihood phylogeny and genome context comparison using these metagenomic data  
143 suggested that at least 7 virus-host exchanges of S21 protein-coding genes have occurred, and across  
144 multiple bacterial phyla (Figure 2, Figure S9). Notably, S21-encoding viruses were almost exclusively  
145 from aquatic samples (90% of S21s detected). Such repeated transfers and enrichment in aquatic  
146 samples suggest that virus-encoded S21 proteins likely can provide a direct fitness benefit to aquatic  
147 bacteriophages. By contrast, L7/L12 and S30AE were found across a broad range of samples (Figures 2,  
148 S6, S10), suggesting that their repeated acquisition could be beneficial in multiple types of conditions  
149 and hosts.

150  
151 Additionally, however, we identified another 11 RPs in uncultivated viruses that were not identified in  
152 the isolate genomes (Table S2). Notable among these, due to being commonly (>10 viral contigs)  
153 detected, are L31 and L33. Although the biological function of L33 remains obscure<sup>24</sup>, it appears to  
154 contact tRNAs in the ribosomal E(exit)-site<sup>25</sup>, whereas L31, similar to S30AE, plays a role in 100S  
155 formation, 70S association, and translation<sup>26</sup>. As in the case of S21, viral contigs encoding L31 or L33  
156 were almost exclusively detected in aquatic environments (Figure 2). Maximum likelihood phylogenies  
157 and genome context comparisons highlighted a consistent pattern of at least 2 independent events of  
158 virus-host transfers involving viruses infecting different bacterial phyla (Figures S10 and S11).

159  
160 Thus, at this point, there is an emerging picture that viruses might randomly sample host DNA, including  
161 ribosomal protein genes, and that in some cases these might become fixed in viral genomes. Most  
162 (>99%) of the viruses contained only a single ribosomal protein gene (exception: 9 uncultivated viral  
163 contigs contained 2; Figure S12), which is clearly not enough for viruses to build functional ribosomes on  
164 their own. Presumably, these viruses are merely tweaking ribosomal functioning in their hosts – just as  
165 observed for auxiliary metabolic genes whereby viruses do not encode complete pathways, but instead  
166 only select genes critical for the takeover and/or reprogramming of the host cell<sup>6,7,27</sup>.

167  
168 Presence of ribosomal protein genes in viral genomes raises a question of what their functions in the  
169 course of the infection cycle might be and how do viruses benefit from carrying such genes. The S30-  
170 encoding gene increases the transformation capacity of FBR-MuSV *in vitro* by twofold, providing clear  
171 fitness advantage to the virus<sup>15</sup>. It is conceivable that homologs of other ribosomal proteins might be  
172 also beneficial for the bacteriophages that encode them. For instance, it is known that S21 is necessary  
173 during translation initiation step and in the absence of S21, ribosomes are incapable of binding natural  
174 mRNAs<sup>17</sup>. Thus, phage-encoded S21 might compete with and replace the cellular S21, forcing  
175 preferential translation of viral transcripts. Similarly, viral L7/L12 domain proteins might provide  
176 interfaces for virus-specific translation factors. Protein L9 is required for translational fidelity and is  
177 involved in suppression of frameshifting. In many members of *Caudovirales* production of certain tail  
178 components is dependent on programmed translational frameshifting<sup>28</sup> and viral copy of L9 might help

179 to achieve optimal frameshifting in these genes. It has been demonstrated that stalling of phage protein  
180 synthesis is one of the major defense strategies in Bacteroidetes<sup>29</sup>. Thus, viral homologs of S30AE and  
181 L31 might compete with the cellular homologs and prevent formation of ribosome dimers, thereby  
182 releasing translation inhibition and ensuring that phage transcripts are efficiently translated.

183  
184 Given what seemed to be reasonable explanations for why viruses might benefit from encoding such  
185 genes, we next investigated whether virus-encoded ribosomal protein genes appeared functional. Thus,  
186 we calculated the ratio of nonsynonymous polymorphisms per non-synonymous site (pN) to the number  
187 of synonymous polymorphisms per synonymous site (pS). This ratio can be used to infer whether genes  
188 are evolving neutrally (pN/pS=1) or positively (pN/pS>1) away from the original function, or whether  
189 such substitutions are largely not tolerated due to purifying selection (pN/pS<1) that would suggest the  
190 gene was functional. These analyses suggested that the vast majority of the viral-encoded RPs were  
191 likely functional as well-sampled genes (>10x coverage, and  $\geq 1$  single nucleotide polymorphism, or SNP)  
192 had an average pN/pS=0.10, with 84% having a pN/pS $\leq$ 0.20 (Table S2).

193  
194 To build on these *in silico* functional assays, we next explored whether the viral proteins are  
195 incorporated into ribosomes, by focusing on 3 RPs encoded by cultivated phages and most frequently  
196 detected in uncultivated phage genomes (Figure 2). These were pelagiphage-encoded S21, L7/L12 from  
197 *Salmonella* phage FSL SP-076, and S30AE from *Escherichia coli* phage rv5. Following moderate and  
198 controlled expression of the respective viral proteins, 70S ribosomes were isolated under high-  
199 stringency salt conditions (see Materials and Methods) to avoid unspecific association of viral proteins<sup>30</sup>.  
200 Judging from the obtained ribosome profiles (Figure 3A) and transmission electron microscopy (Figure  
201 3B), expression of the viral proteins did not affect the 70S stability. All examined samples nearly  
202 exclusively contained 70S monoribosomes. Subsequent mass spectrometry (MS) analysis of the 70S  
203 ribosomes purified on the sucrose gradients unequivocally showed that S21 and L7/L12 (Figure 3C,  
204 Supplementary Table S4 and S5), but not S30AE (Supplementary Table S6), were stably incorporated into  
205 the 70S ribosomes when expressed in *E. coli*. Notably, S30AE was detected using MS in the crude cell  
206 extracts (Figure 3C, Supplementary Table S7), indicating that lack of its incorporation into ribosomes is  
207 not due to poor protein expression, but may rather result from other factors, such as inadequate growth  
208 phase, genuine loss of ability to bind to ribosomes or dissociation due to stringent washes with salt  
209 during 70S ribosome isolation. Regardless, binding of viral S21 and L7/L12 to ribosomes strongly  
210 suggests that these and possibly other viral RPs modulate protein translation during phage infection.

211  
212 In summary, this work builds upon prior discoveries of aminoacyl-tRNA synthetase genes encoded by  
213 giant viruses (family *Mimiviridae*)<sup>11,12</sup>. Our current work shows that even ribosomal proteins are encoded  
214 by numerous cultivated and uncultivated viruses with relatively small genomes, and offers support for  
215 them having an evolutionary fitness advantage for viruses during infection. Interestingly, virus-encoded  
216 RPs appear to be differentially selected for across environments as aquatic viruses are enriched for S21,  
217 L31 and L33, whereas phages of animal-associated bacteria are enriched for S6, S9, S15 and S30AE.  
218 Curiously, although ribosomes are highly stable macromolecular assemblies which retain most of their  
219 original components during cellular growth and division<sup>31</sup>, some elements (proteins S21, L7/L12, L9, L31  
220 and L33) are highly dynamic, solvent accessible, and among the few proteins that are loosely bound to  
221 the ribosome and can be exchanged *in vivo* between ribosomes<sup>31,32</sup>. It is these dynamic ribosomal  
222 proteins that are enriched in viruses, which presumably is because they are most suited to homologous  
223 replacement during infection and therefore of a functional fitness advantage during phage evolution.  
224 Analogously, modulation of photosynthesis as well as nitrogen and sulfur cycles in infected cells hinges  
225 on a handful of key proteins captured by viruses from their respective hosts<sup>6,8,33</sup>. More generally, such  
226 selective acquisition of key components of the multisubunit assemblies, such as ribosomes and

227 photosystems, or recruitment of central regulators of rate-limiting steps in metabolic pathways appears  
228 to be a general strategy employed by viruses to optimize the metabolic state of the infected cells and/or  
229 to achieve the takeover of the host.

230

231

232

## 233 **METHODS**

### 234 **Sequence analyses**

235 All viral genomes were downloaded from viral RefSeq database  
236 (<ftp://ftp.ncbi.nlm.nih.gov/refseq/release/viral/>). A hidden Markov model (HMM) profile was  
237 downloaded from the PFAM database (<http://pfam.xfam.org/>) for each domain listed in Table S1. In  
238 total, 106 sequence profiles corresponding to distinct ribosomal protein domains were used as seeds to  
239 search the proteomes of viruses infecting hosts from the three cellular domains, as well as proteins  
240 predicted on viral contigs from two previously published global metagenomic datasets, Global Ocean  
241 Virome<sup>8</sup>, and Earth's Virome<sup>23</sup>, which are available at <https://img.jgi.doe.gov/cgi-bin/vr/main.cgi> and  
242 <http://datacommons.cyverse.org/browse/iplant/home/shared/iVirus/GOV>. Notably, domain S1, which  
243 is repeated 4 to 6 times in the ribosomal protein S1, is not exclusive to RPs as it is common across  
244 diverse RNA-binding proteins and fused to non-ribosomal functional motifs (pfam id: PF00575.18). Thus  
245 while domain S1 was found in homologs of vaccinia virus interferon inhibitor K3L<sup>34</sup>, which is conserved  
246 in chordopoxviruses belonging to 7 different genera, it was not considered further due to potential  
247 functional ambiguity. The domains were identified by HHsearch<sup>35</sup> with E-value of 1e-5. For isolates, the  
248 identified hits were then manually inspected using HHPRED<sup>35</sup>. All alignments were constructed using  
249 PROMALS3D<sup>36</sup>. Maximum likelihood phylogenetic trees were constructed using PhyML<sup>37</sup> using a WAG  
250 substitution model and the proportion of invariable sites estimated from the data. For metagenomic  
251 predicted proteins, multiple alignments were built with Muscle<sup>38</sup> and maximum likelihood phylogenetic  
252 trees were computed with FastTree<sup>39</sup>, and displayed with iTol<sup>40</sup>. Genomic comparisons were performed  
253 using BLAST with the BLOSUM45 matrix. The ribosomal structure was downloaded from PDB database  
254 and visualized using Chimera<sup>41</sup>.

255

256 To further confirm the functionality of RPs encoded on uncultivated viral genomes, selective constraint  
257 on these auxiliary metabolic genes was evaluated through pN/pS calculation, as in REF. 42. Briefly,  
258 synonymous and non-synonymous SNPs were observed in each ribosomal protein gene covered  $\geq 10x$ ,  
259 and compared to expected ratio of synonymous and non-synonymous SNPs under a neutral evolution  
260 model if at least 1 SNP was identified. The interpretation of pN/pS is similar as for dN/dS analyses, with  
261 the operation of purifying selection leading to pN/pS values  $< 1$ .

262

### 263 **Genetic constructions**

264 The genes encoding for S21 protein from *Pelagibacter* phage HTVC008M (AGE60443), S30AE protein  
265 from *Escherichia coli* bacteriophage rv5 and L7/L12 protein from *Salmonella* phage FSL SP-076  
266 (AGF88397) were synthesized by Eurofins Genomics (Ebersberg, Germany). S21 and S30AE genes were  
267 cloned into pEX-A2 plasmid and L7/L12 gene into pEX-K4 plasmid. The gene corresponding to S30AE viral  
268 protein was digested by BsaI and HindIII and inserted into a pBAD24 vector between NcoI and HindIII  
269 restriction sites. The genes corresponding to S21 and L7/L12 viral proteins were cloned into the same  
270 vector, using EcoRI and HindIII restriction sites. The pBAD24 plasmid harbors an arabinose dependent  
271 promoter, a pBR322 origin and the ampicillin resistance coding sequence.

272

### 273 **Protein expression and cell retrieval**

274 NM522 *Escherichia coli* strain was used for expression of viral S21, S30AE and L7/L12 proteins. The same  
275 strain harboring empty pBAD24 was used as a negative control. Overnight pre-cultures were grown in  
276 the presence of 1mM of L-arabinose and 100µg/mL of ampicillin. Then the expression was maintained in  
277 the cell culture until the end of exponential phase. Once the cultures reached an OD<sub>600nm</sub> of 1, the cells  
278 were centrifuged at 7,000rpm for 7 minutes at 4°C. The cell pellet was then washed into saline water at  
279 a concentration of 9g/L of NaCl. A second centrifugation was made and the bacterial pellet was frozen at  
280 -80°C.

281

### 282 **70S Ribosome purification**

283 The cells were resuspended in Buffer 1 (Tris-HCl pH7.5 20mM, MgOAc 50mM, NH<sub>4</sub>Cl 100mM, EDTA  
284 0.5mM and DTT 1mM) and finally lysed using the French Press. The lysate was centrifuged and the  
285 supernatant was put above the same volume of high-salt sucrose buffer (Tris-HCl pH7.5 10mM, MgCl<sub>2</sub>  
286 10mM, NH<sub>4</sub>Cl 500mM, EDTA 0.5mM, certified RNase free sucrose 1.1M and DTT 1mM) in order to wash  
287 the ribosomes. After centrifugation at 30,000rpm for 20h at 4°C, the ribosomes form a translucent  
288 pellet. The ribosome pellet was washed several times to remove membranes and then resuspended in  
289 Buffer 2 (Tris-HCl pH7.5 10mM, MgCl<sub>2</sub> 10mM, NH<sub>4</sub>Cl 50mM, EDTA 0.5mM and DTT 1mM) on ice. An  
290 equivalent of 200OD<sub>260nm</sub> units of ribosomes were loaded on top of a 10-50% sucrose gradient into  
291 polycarbonate tubes. The ultra-centrifugation was performed at 23,000rpm, for 18h at 4°C using SW28  
292 rotor (BECKMAN L-90 ultracentrifuge). The gradient was then fractionated into 500µL aliquots. The  
293 OD<sub>260nm</sub> values were determined for each fraction to locate the 70S absorbance peak. The corresponding  
294 fractions were pooled in one volume of buffer 2 and centrifuged at 30,000rpm for 20h at 4°C in order to  
295 remove sucrose. The pellet was recovered in buffer 2 and after titration, the ribosomes were ready for  
296 mass spectrometry analysis.

297

### 298 **Negative staining**

299 Following ribosome separation, we diluted samples 10 times in Buffer 2 and applied them to freshly  
300 glow-discharged 300-mesh collodion/carbon-coated grids. After three washes in this buffer, grids were  
301 stained with 2% uranyl acetate for 30 s. The grids were then observed with a Tecnai G2 Sphera  
302 transmission electron microscope operating at 200 kV. Images were recorded with a 4000 × 4000 Gatan  
303 Ultrascan 4000 CCD camera at a nominal magnification of 50,000×.

304

### 305 **LC-MS/MS proteins identification**

#### 306 - Liquid digestion of ribosomal samples

307 25 µg of ribosomes were digested according to the following protocol: first, 53.5 µl of 50mM ammonium  
308 bicarbonate buffer (pH 7,8) was added to the sample to 65 µL total volume. After vortexing 1 minute,  
309 tubes were incubated 10 minutes at 80°C and then sonicated for two minutes. Reduction of disulfide  
310 bonds step was processed by adding 12.5 µl of 65mM DTT to the sample and was incubated 15 minutes  
311 at 37°C after agitation 1 minute. Alkylation of reduced disulfide bonds was realized by adding 135mM  
312 iodoacetamide. Microtube was then incubated 15 minutes in the dark at room temperature, under  
313 agitation. Finally, proteins were digested overnight at 37°C with 10 µl of either modified endoproteinase  
314 glu-c ([0.1 µg/µl.], Promega, Madison, WI) in 50 mM ammonium bicarbonate buffer for S21 (due to high  
315 lysine and arginine content in S21) or with modified Trypsine ([0.1 µg/µl.], Promega, Madison, WI) in 50  
316 mM ammonium bicarbonate buffer for S30AE, L7/L12 and control.

317

#### 318 - Protein Prefractionation and Digestion

319 Twenty five micrograms of soluble crude protein extracts of *E. coli* were boiled for 10 min with 5  $\mu$ l of  
320 LDS Sample buffer 4X and 2 $\mu$ l of reducing agent (DTT 10X (500mM)). They were then separated on a  
321 NuPAGE® Novex® 4-12 % gradient Bis-Tris gel (Invitrogen Corporation, USA) in MES SDS Running Buffer  
322 (Invitrogen: 50 mM MES, 50 mM Tris-HCl, 1 % SDS, 1.025Mm EDTA) using Xcell SureLock Mini Cell  
323 (Invitrogen).

324  
325 Gel was stained with EZBlue (Sigma-Aldrich) for 30 min and destained with water over night. Each gel  
326 lane was manually cut into 2 slices of approximately the same size in the region of 7kDa-14kDa. The  
327 slices were first treated with 50 mM  $\text{NH}_4\text{HCO}_3$  in acetonitrile/water 1:1 (v/v), dehydrated with 100%  
328 acetonitrile and rehydrated in 100 mM  $\text{NH}_4\text{HCO}_3$ . Next they were washed again with 50 mM  $\text{NH}_4\text{HCO}_3$   
329 in acetonitrile/water, 1:1 (v/v) and dehydrated with 100% acetonitrile. The slices were then treated with  
330 65 mM DTT for 15 min at 37 °C, and with 135 mM iodoacetamide in the dark at room temperature.  
331 Finally, the samples were washed with 100 mM  $\text{NH}_4\text{HCO}_3$  in acetonitrile/water, 1:1 (v/v), and  
332 dehydrated with 100% acetonitrile before being rehydrated in 100 mM  $\text{NH}_4\text{HCO}_3$ , washed with 100 mM  
333  $\text{NH}_4\text{HCO}_3$  in acetonitrile/water, 1:1 (v/v) and then dehydrated again with 100% acetonitrile. Proteins  
334 were digested overnight at 37 °C with 4 ng/l of modified trypsin (Promega, Madison, WI) in 50 mM  
335  $\text{NH}_4\text{HCO}_3$ . Peptides were extracted by incubating the slices first in 80  $\mu$ l of acetonitrile/  
336 water/trifluoroacetic acid (70/30/0.1; v/v/v) for 20 min, and then in 40  $\mu$ l of 100% acetonitrile for 5 min  
337 and finally in 40  $\mu$ l of acetonitrile/water/trifluoroacetic acid (70/30/0.1; v/v/v) for 15 min. Supernatants  
338 were transferred into fresh tubes and concentrated in a SpeedVac (Thermo Scientific) for 15 min to a  
339 final volume of 40  $\mu$ l.

340  
341 - LC-MS/MS analysis

342 Shotgun analyses were conducted on a LTQ-Orbitrap XL (ThermoFisher Scientific) mass spectrometer.  
343 The MS measurements were done with a nanoflow highperformance liquid chromatography (HPLC)  
344 system (Dionex, LC Packings Ultimate 3000) connected to a hybrid LTQ-Orbitrap XL (Thermo Fisher  
345 Scientific) equipped with a nanoelectrospray ion source (New Objective). The HPLC system consisted of  
346 a solvent degasser nanoflow pump, a thermostated column oven kept at 30 °C, and a thermostated  
347 autosampler kept at 8 °C to reduce sample evaporation. Mobile A (99.9% Milli-Q water and 0.1% formic  
348 acid (v:v)) and B (99.9% acetonitrile and 0.1% formic acid (v:v)) phases for HPLC were delivered by the  
349 Ultimate 3000 nanoflow LC system (Dionex, LC Packings). An aliquot of 10  $\mu$ l of prepared peptide  
350 mixture was loaded onto a trapping precolumn (5 mm  $\times$  300  $\mu$ m i.d., 300 Å pore size, Pepmap C18, 5  
351  $\mu$ m) over 3 min in 2% buffer B at a flow rate of 25  $\mu$ l/min. This step was followed by reverse-phase  
352 separations at a flow rate of 0.250  $\mu$ l/min using an analytical column (15 cm  $\times$  300  $\mu$ m i.d., 300 Å pore  
353 size, Pepmap C18, 5  $\mu$ m, Dionex, LC Packings). We ran a gradient from 2–35% buffer B for the first 60  
354 min, 35–60% buffer B from minutes 60–85, and 60–90% buffer B from minutes 85–105. Finally, the  
355 column was washed with 90% buffer B for 16 min and with 2% buffer B for 19 min before the next  
356 sample was loaded. The peptides were detected by directly eluting them from the HPLC column into the  
357 electrospray ion source of the mass spectrometer. An electrospray ionization (ESI) voltage of 1.6 kV was  
358 applied to the HPLC buffer using the liquid junction provided by the nanoelectrospray ion source, and  
359 the ion transfer tube temperature was set to 200 °C. The LTQ-Orbitrap XL instrument was operated in its  
360 data-dependent mode by automatically switching between full survey scan MS and consecutive MS/MS



361 acquisitions. Survey full scan MS spectra (mass range 400–2000) were acquired in the Orbitrap section  
362 of the instrument with a resolution of  $r = 60\,000$  at  $m/z$  400; ion injection times were calculated for each  
363 spectrum to allow for accumulation of  $10^6$  ions in the Orbitrap. The ten most intense peptide ions in  
364 each survey scan with an intensity above 2000 counts (to avoid triggering fragmentation too early  
365 during the peptide elution profile) and a charge state  $\geq 2$  were sequentially isolated at a target value of  
366 10 000 and fragmented in the linear ion trap by collision-induced dissociation. Normalized collision  
367 energy was set to 35% with an activation time of 30 ms. Peaks selected for fragmentation were  
368 automatically put on a dynamic exclusion list for 30 s with a mass tolerance of  $\pm 10$  ppm to avoid  
369 selecting the same ion for fragmentation more than once. The following parameters were used: the  
370 repeat count was set to 1, the exclusion list size limit was 500, singly charged precursors were rejected,  
371 and the maximum injection time was set at 500 and 300 ms for full MS and MS/MS scan events,  
372 respectively. For an optimal duty cycle, the fragment ion spectra were recorded in the LTQ mass  
373 spectrometer in parallel with the Orbitrap full scan detection.

374  
375 For Orbitrap measurements, an external calibration was used before each injection series ensuring an  
376 overall error mass accuracy below 5 ppm for the detected peptides. MS data were saved in RAW file  
377 format (Thermo Fisher Scientific) using XCalibur 2.0.7 with tune 2.4. The data analysis was performed  
378 with Proline software 1.4 supported by Mascot Distiller and Mascot server (v2.5.1;  
379 <http://www.matrixscience.com>) database search engine for peptide and protein identification using its  
380 automatic decoy database search to calculate a false discovery rate (FDR) of 1% at the peptide level.  
381 MS/MS spectra were compared to the *Escherichia coli* Reference proteome set database containing the  
382 phage ribosomal proteins (UniProt release 2017\_01, January 18 2017, 23022 sequences, 7070297  
383 residues). Mass tolerance for MS and MS/MS was set at 10 ppm and 0.5 Da, respectively. The enzyme  
384 selectivity was set to full trypsin with one miscleavage allowed for samples S30AE and L7/L12 and the  
385 enzyme selectivity was set to full V8-DE with one miscleavage allowed for sample S21.

386  
387 Protein modifications were fixed carbamidomethylation of cysteines, variable oxidation of methionine,  
388 variable acetylation of lysine, variable acetylation of N-terminal residues.

389  
390  
391

## 392 **ACKNOWLEDGEMENTS**

393 This work was supported by grant ERC UE 340440 to PF and Agence Nationale pour la Recherche,  
394 Direction Générale de l'Armement (#ANR-14-ASTR-0001) to RG. CMM was supported by the European  
395 Molecular Biology Organization (ALTF 1562-2015) and Marie Curie Actions program from the European  
396 Commission (LTFCOFUND2013, GA-2013-609409); CG was supported by Direction Générale de  
397 l'Armement and Ministère de l'Enseignement supérieur et de la Recherche; SR and MBS were supported  
398 by Gordon and Betty Moore Foundation (#3305, 3790) and National Science Foundation (OCE#1536989)  
399 awards. The work conducted by the U.S. Department of Energy Joint Genome Institute, a DOE Office of  
400 Science User Facility, is supported under Contract No. DE-AC02-05CH11231. The Ohio Supercomputer is  
401 acknowledged for high-performance compute support. We thank Fanny Demay for the technical  
402 assistance and Sophie Chat for help with electron microscopy.

403

**Table1.** Ribosomal protein domains found in cultivated viruses.

| Domain          | Name (Family)                                          | Protein accession, length (aa) | Coverage (%) | Identity (%) | Probability (%) | E-value |
|-----------------|--------------------------------------------------------|--------------------------------|--------------|--------------|-----------------|---------|
| Ribosomal_S30   | Finkel-Biskis-Reilly murine sarcoma virus ( <i>R</i> ) | NP_598374, 133                 | 85           | 86           | 99.92           | 2.2E-26 |
| Ribosomal_S21   | Pelagibacter phage HTVC008M ( <i>M</i> )               | AGE60443, 67                   | 59           | 46           | 99.81           | 2.7E-19 |
| Ribosomal_L9_N  | Mycobacterium phage 32HC ( <i>S</i> )                  | AHJ86298, 86                   | 33           | 40           | 98.32           | 4.3E-07 |
| Ribosomal_L12   | Dinoroseobacter phage DFL12phi1 ( <i>P</i> )           | AHX01035, 106                  | 74           | 32           | 99.9            | 1.0E-23 |
|                 | Erwinia phage Ea9-2 ( <i>P</i> )                       | AHI60108, 724                  | 9            | 32           | 96.87           | 6.3E-03 |
|                 | Ralstonia phage RSB3 DNA ( <i>P</i> )                  | BAN92321, 98                   | 59           | 32           | 99.77           | 2.2E-18 |
|                 | Roseophage DSS3P2 ( <i>P</i> )                         | ACL81275, 107                  | 62           | 28           | 99.44           | 3.7E-13 |
|                 | Salmonella phage FSL SP-058 ( <i>P</i> )               | AGF88397, 418                  | 16           | 34           | 96.05           | 1.8E-01 |
|                 | Salmonella phage FSL SP-076 ( <i>P</i> )               | AGF88198, 418                  | 15           | 36           | 96.21           | 2.6E-02 |
|                 | Sulfitobacter phage phiCB2047-B ( <i>P</i> )           | AGH07436, 126                  | 25           | 47           | 97.06           | 1.8E-03 |
| Ribosomal_S30AE | Cronobacter phage vB CsaM GAP32 ( <i>M</i> )           | AFC21633, 111                  | 71           | 34           | 99.96           | 4.2E-28 |
|                 | Enterobacteria phage vB EcoM-FV3 ( <i>M</i> )          | AEZ65272, 105                  | 74           | 35           | 99.92           | 1.5E-23 |
|                 | Escherichia coli bacteriophage rv5 ( <i>M</i> )        | ABI79209, 105                  | 74           | 33           | 99.96           | 1.3E-27 |
|                 | Escherichia phage 2 JES-2013 ( <i>M</i> )              | AGM12525, 105                  | 74           | 32           | 99.96           | 3.0E-28 |
|                 | Escherichia coli O157 typing phage 14 ( <i>M</i> )     | AKE47110, 105                  | 74           | 33           | 99.96           | 3.4E-28 |
|                 | Escherichia phage vB EcoM FFH2 ( <i>M</i> )            | AEZ65272, 105                  | 74           | 35           | 99.93           | 7.9E-24 |

\**R*: Retroviridae, *M*: Myoviridae, *S*: Siphoviridae, *P*: Podoviridae

404  
405  
406  
407  
408

409 **FIGURE LEGENDS**

410 **Figure 1. Virus-encoded ribosomal protein S21.** **a)** Structure of the *Escherichia coli* 30S ribosomal  
411 subunit (PDB id: 4ADV). 16S ribosomal RNA is shown as blue ribbon. S21 ribosomal protein is highlighted  
412 in pink. **b)** Alignment of the ribosomal protein S21 encoded by pelagiphage HTVC008M with homologs  
413 from representatives of distinct bacterial taxa and environmental sequences obtained from the Global  
414 Ocean Sampling (GOS) dataset. **c)** Phylogenetic tree of ribosomal protein S21. Taxonomic affiliations are  
415 represented by colored circles (see legend).

416  
417 **Figure 2. Detection of ribosomal proteins in uncultivated viral genomes (assembled from**  
418 **metagenomes).** For each ribosomal protein detected, the total number of detection is shown on the y-  
419 axis ( $\log_{10}$  scale), and the bar is colored according to the type of samples in which this protein was  
420 detected (the sizes of the colored parts are proportional to the number of detections made in each type  
421 of samples). Ribosomal proteins also identified in cultivated viruses are identified with stars.

422  
423 **Figure 3. Ribosome analysis of extracts from NM522 *Escherichia coli* cells.** **a)** A260 profile of ribosome  
424 extracts separated on a sucrose gradient. *Escherichia coli* cells expressing viral S21 (red), S30AE (blue) or  
425 L7/L12 (green) were separated through a 10%–50% sucrose gradient and fractionated to be compared  
426 to the same strain in the absence of induction (black curve) (see experimental section). The dotted lines  
427 indicate the fractions that were pooled and analyzed by mass spectrometry. **b)** The corresponding 70S  
428 fractions (dot lines, same color codes) were visualized on electron micrographs of 70S ribosomes  
429 negatively stained with 2% uranyl acetate. Scale bars: 50 nm. **c)** S21, S30AE and L7/L12 peptides  
430 identified by mass spectrometry in ribosome preparation and crude cell extract, respectively. Asterisk  
431 denotes oxidized form of methionine. N.D., not determined.

432 **Supporting information available**

433 **Supplementary Table S1:** List and PFAM accessions of ribosomal protein domains searched for in viral  
434 proteomes.

435 **Supplementary Table S2:** Detection of ribosomal proteins in uncultivated viral genomes. Metagenomes  
436 were classified as “Environmental”, “Engineered”, or “Host-associated” according to the GOLD database  
437 (<https://gold.jgi.doe.gov>). Values of pN/pS were calculated for all ribosomal proteins in a contig covered  
438 > 10x and with at least 1 SNP detected.

439 **Supplementary Table S3:** List of 81 proteins identified in ribosomes purified from *E.coli* control cells,  
440 including detailed mass spectrometry information on peptide sequences.

441 **Supplementary Table S4:** List of 54 proteins identified in ribosomes purified from *E.coli* cells after  
442 expression of viral S21 protein, including detailed mass spectrometry information on peptide sequences.  
443 The table also includes extended information on phage protein identification in S21 ribosomal sample.

444 **Supplementary Table S5:** List of 80 proteins identified in ribosomes purified from *E.coli* cells after  
445 expression of viral L7/L12 protein, including detailed mass spectrometry information on peptide  
446 sequences. The table also includes extended information on phage protein identification in L7/L12  
447 ribosomal sample.

448 **Supplementary Table S6:** List of 71 proteins identified in ribosomes purified from *E.coli* cells after  
449 expression of viral S30AE protein, including detailed mass spectrometry information on peptide  
450 sequenced. Beta-galactosidase was added as an internal control.

451 **Supplementary Table S7:** List of 279 proteins identified in crude *E.coli* cell extracts after expression of  
452 viral S30AE protein, including detailed mass spectrometry information on peptide sequenced.

453

## References

- 454 1 Roux, S., Krupovic, M., Debroas, D., Forterre, P. & Enault, F. Assessment of viral community  
455 functional potential from viral metagenomes may be hampered by contamination with cellular  
456 sequences. *Open Biol* 3, 130160 (2013).
- 457 2 Sharon, I. *et al.* Comparative metagenomics of microbial traits within oceanic viral communities.  
458 *Isme J* 5, 1178-1190 (2011).
- 459 3 Lindell, D., Jaffe, J. D., Johnson, Z. I., Church, G. M. & Chisholm, S. W. Photosynthesis genes in  
460 marine viruses yield proteins during host infection. *Nature* 438, 86-89 (2005).
- 461 4 Sullivan, M. B. *et al.* Genomic analysis of oceanic cyanobacterial myoviruses compared with T4-like  
462 myoviruses from diverse hosts and environments. *Environ Microbiol* 12, 3035-3056 (2010).
- 463 5 Hurwitz, B. L., Brum, J. R. & Sullivan, M. B. Depth-stratified functional and taxonomic niche  
464 specialization in the 'core' and 'flexible' Pacific Ocean Virome. *Isme J* 9, 472-484 (2015).
- 465 6 Thompson, L. R. *et al.* Phage auxiliary metabolic genes and the redirection of cyanobacterial host  
466 carbon metabolism. *Proc Natl Acad Sci U S A* 108, E757-764 (2011).
- 467 7 Anantharaman, K. *et al.* Sulfur oxidation genes in diverse deep-sea viruses. *Science* 344, 757-760  
468 (2014).
- 469 8 Roux, S. *et al.* Ecogenomics and potential biogeochemical impacts of globally abundant ocean  
470 viruses. *Nature* 537, 689-693 (2016).
- 471 9 Maxwell, K. L. Phages Fight Back: Inactivation of the CRISPR-Cas Bacterial Immune System by Anti-  
472 CRISPR Proteins. *PLoS Pathog* 12, e1005282 (2016).
- 473 10 Nechaev, S. & Severinov, K. Bacteriophage-induced modifications of host RNA polymerase. *Annu*  
474 *Rev Microbiol* 57, 301-322 (2003).
- 475 11 Raoult, D. *et al.* The 1.2-megabase genome sequence of Mimivirus. *Science* 306, 1344-1350 (2004).
- 476 12 Schulz, F. *et al.* Giant viruses with an expanded complement of translation system components.  
477 *Science* 356, 82-85 (2017).
- 478 13 Forterre, P., Krupovic, M. & Prangishvili, D. Cellular domains and viral lineages. *Trends Microbiol* 22,  
479 554-558 (2014).
- 480 14 Raoult, D. & Forterre, P. Redefining viruses: lessons from Mimivirus. *Nat Rev Microbiol* 6, 315-319  
481 (2008).
- 482 15 Michiels, L., Van der Rauwelaert, E., Van Hasselt, F., Kas, K. & Merregaert, J. *fau* cDNA encodes a  
483 ubiquitin-like-S30 fusion protein and is expressed as an antisense sequence in the Finkel-Biskis-  
484 Reilly murine sarcoma virus. *Oncogene* 8, 2537-2546 (1993).

- 485 16 Mourtada-Maarabouni, M., Kirkham, L., Farzaneh, F. & Williams, G. T. Regulation of apoptosis by  
486 fau revealed by functional expression cloning and antisense expression. *Oncogene* 23, 9419-9426  
487 (2004).
- 488 17 Van Duin, J. & Wijnands, R. The function of ribosomal protein S21 in protein synthesis. *FEBS J* 118,  
489 615-619 (1981).
- 490 18 Morris, R. M. *et al.* SAR11 clade dominates ocean surface bacterioplankton communities. *Nature*  
491 420, 806-810 (2002).
- 492 19 Atkins, J. F. & Bjork, G. R. A gripping tale of ribosomal frameshifting: extragenic suppressors of  
493 frameshift mutations spotlight P-site realignment. *Microbiol Mol Biol Rev* 73, 178-210 (2009).
- 494 20 Hoffman, D. W., Cameron, C. S., Davies, C., White, S. W. & Ramakrishnan, V. Ribosomal protein L9: a  
495 structure determination by the combined use of X-ray crystallography and NMR spectroscopy. *J Mol*  
496 *Biol* 264, 1058-1071 (1996).
- 497 21 Gudkov, A. The L7/L12 ribosomal domain of the ribosome: structural and functional studies. *FEBS*  
498 *Lett* 407, 253-256 (1997).
- 499 22 Trauner, A., Loughheed, K. E., Bennett, M. H., Hingley-Wilson, S. M. & Williams, H. D. The dormancy  
500 regulator DosR controls ribosome stability in hypoxic mycobacteria. *J Biol Chem* 287, 24053-24063  
501 (2012).
- 502 23 Paez-Espino, D. *et al.* Uncovering Earth's virome. *Nature* 536, 425-430 (2016).
- 503 24 Maguire, B. A. & Wild, D. G. The roles of proteins L28 and L33 in the assembly and function of  
504 *Escherichia coli* ribosomes in vivo. *Mol Microbiol* 23, 237-245 (1997).
- 505 25 Korepanov, A. P., Korobeinikova, A. V., Shestakov, S. A., Garber, M. B. & Gongadze, G. M. Protein L5  
506 is crucial for in vivo assembly of the bacterial 50S ribosomal subunit central protuberance. *Nucleic*  
507 *acids research* 40, 9153-9159 (2012).
- 508 26 Ueta, M., Wada, C., Bessho, Y., Maeda, M. & Wada, A. Ribosomal protein L31 in *Escherichia coli*  
509 contributes to ribosome subunit association and translation, whereas short L31 cleaved by protease  
510 7 reduces both activities. *Genes Cells* 22, 452-471 (2017).
- 511 27 Rosenwasser, S., Ziv, C., Creveld, S. G. & Vardi, A. Virocell Metabolism: Metabolic Innovations  
512 During Host-Virus Interactions in the Ocean. *Trends Microbiol* 24, 821-832 (2016).
- 513 28 Xu, J., Hendrix, R. W. & Duda, R. L. Conserved translational frameshift in dsDNA bacteriophage tail  
514 assembly genes. *Mol Cell* 16, 11-21 (2004).
- 515 29 Howard-Varona, C. *et al.* Regulation of infection efficiency in a globally abundant marine  
516 Bacteriodes virus. *Isme J* 11, 284-295 (2017).

- 517 30 Mehta, P., Woo, P., Venkataraman, K. & Karzai, A. W. Ribosome purification approaches for  
518 studying interactions of regulatory proteins and RNAs with the ribosome. *Methods Mol Biol* 905,  
519 273-289 (2012).
- 520 31 Subramanian, A.-R. & van Duin, J. Exchange of individual ribosomal proteins between ribosomes as  
521 studied by heavy isotope-transfer experiments. *Mol Gen Genet* 158, 1-9 (1977).
- 522 32 Yamamoto, T., Izumi, S. & Gekko, K. Mass spectrometry of hydrogen/deuterium exchange in 70S  
523 ribosomal proteins from *E. coli*. *FEBS letters* 580, 3638-3642 (2006).
- 524 33 Lindell, D. *et al.* Genome-wide expression dynamics of a marine virus and host reveal features of co-  
525 evolution. *Nature* 449, 83-86 (2007).
- 526 34 Dar, A. C. & Sicheri, F. X-ray crystal structure and functional analysis of vaccinia virus K3L reveals  
527 molecular determinants for PKR subversion and substrate recognition. *Mol Cell* 10, 295-305 (2002).
- 528 35 Soding, J. Protein homology detection by HMM-HMM comparison. *Bioinformatics* 21, 951-960  
529 (2005).
- 530 36 Pei, J., Kim, B. H. & Grishin, N. V. PROMALS3D: a tool for multiple protein sequence and structure  
531 alignments. *Nucleic Acids Res* 36, 2295-2300 (2008).
- 532 37 Guindon, S. *et al.* New algorithms and methods to estimate maximum-likelihood phylogenies:  
533 assessing the performance of PhyML 3.0. *Syst Biol* 59, 307-321 (2010).
- 534 38 Edgar, R. C. MUSCLE: multiple sequence alignment with high accuracy and high throughput. *Nucleic  
535 acids research* 32, 1792-1797 (2004).
- 536 39 Price, M. N., Dehal, P. S. & Arkin, A. P. FastTree 2--approximately maximum-likelihood trees for  
537 large alignments. *PLoS One* 5, e9490 (2010).
- 538 40 Letunic, I. & Bork, P. Interactive tree of life (iTOL) v3: an online tool for the display and annotation  
539 of phylogenetic and other trees. *Nucleic acids research* 44, W242-245 (2016).
- 540 41 Pettersen, E. F. *et al.* UCSF Chimera--a visualization system for exploratory research and analysis. *J  
541 Comput Chem* 25, 1605-1612 (2004).
- 542 42 Schloissnig, S. *et al.* Genomic variation landscape of the human gut microbiome. *Nature* 493, 45-50  
543 (2013).

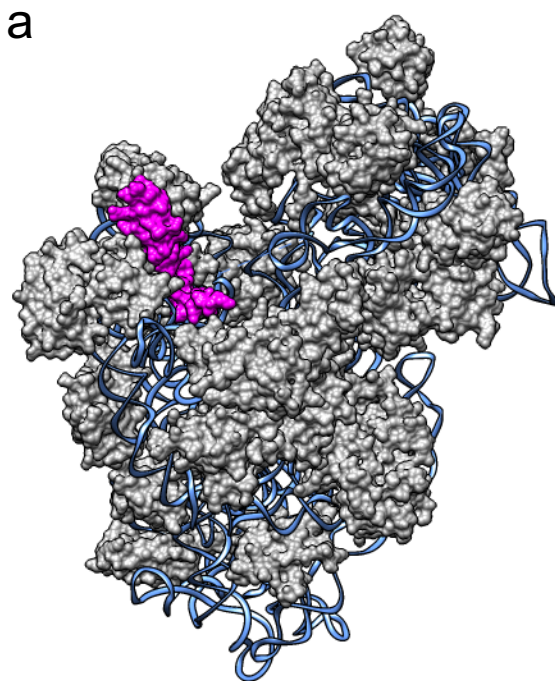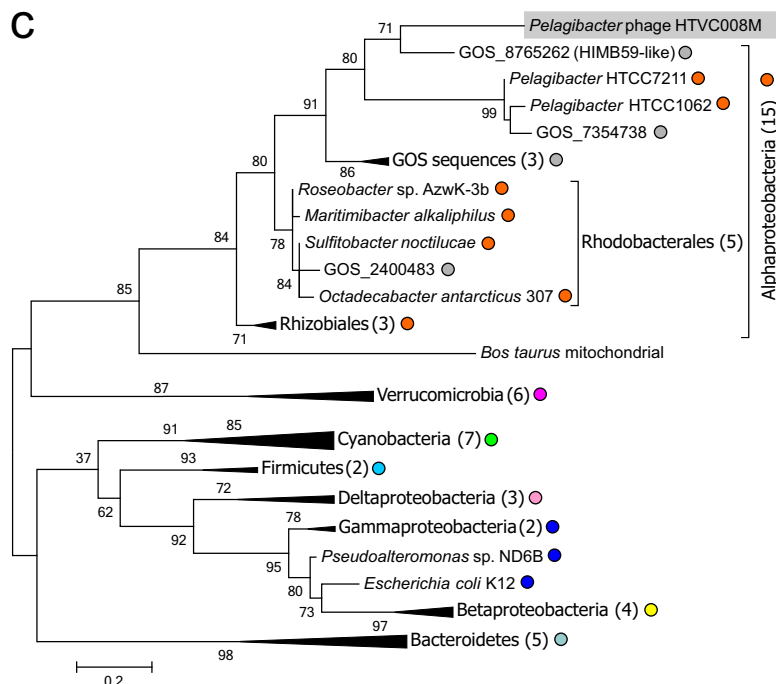

● Alphaproteobacteria    ● Cyanobacteria    ● Gammaproteobacteria    ● Bacteroidetes    ○ environmental  
● Betaproteobacteria    ● Firmicutes    ● Deltaproteobacteria    ● Verrucomicrobia

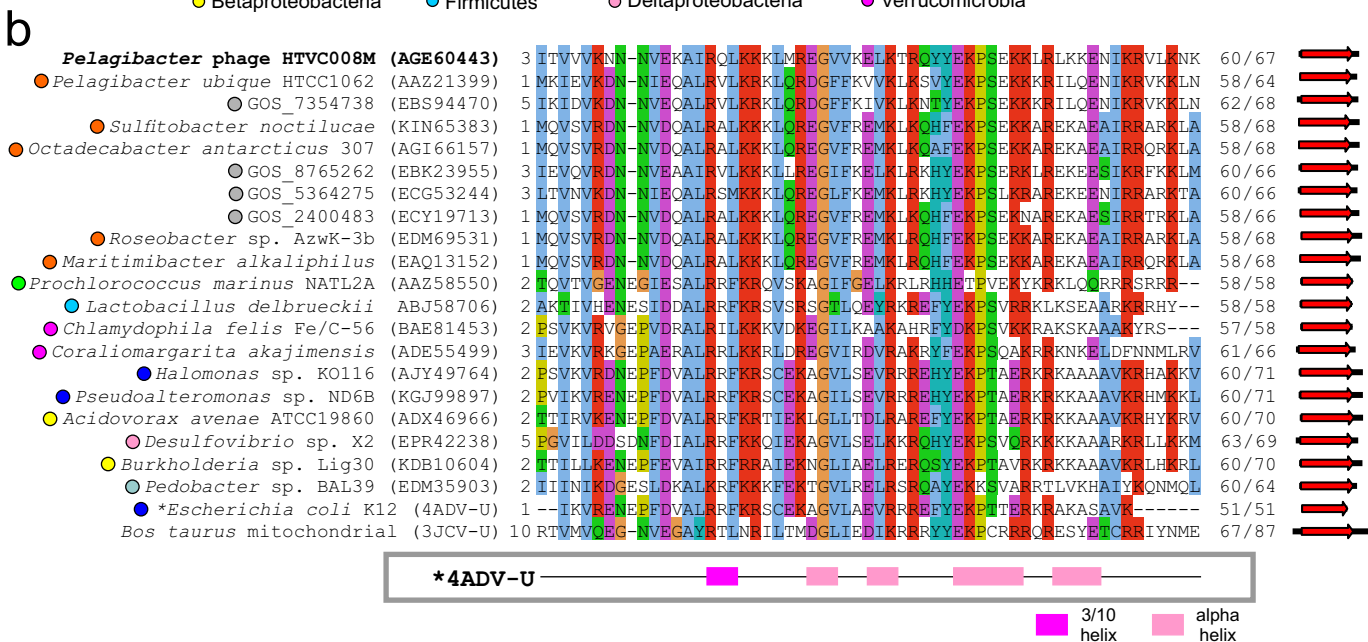



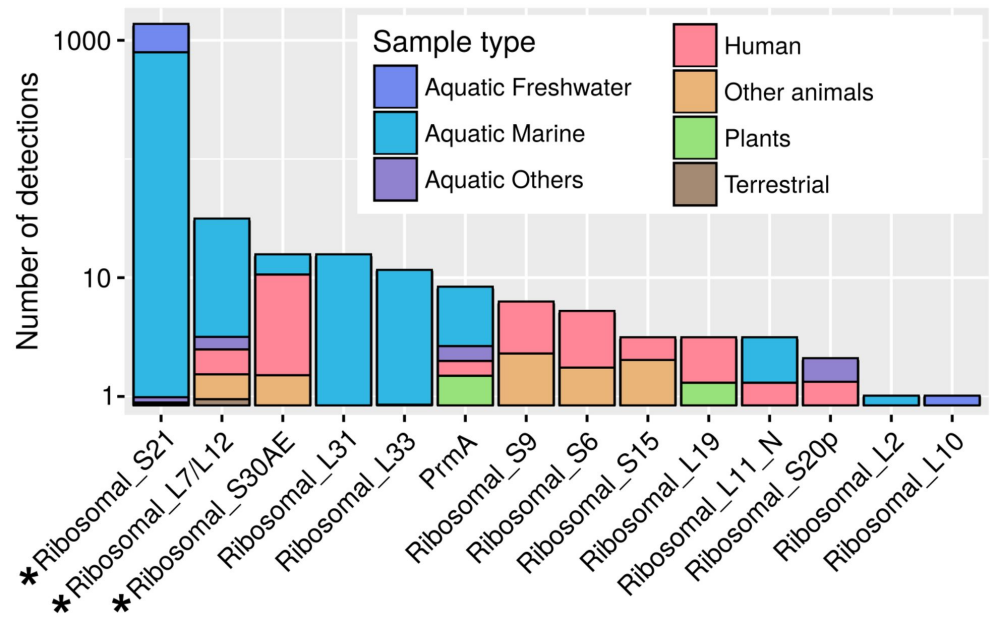

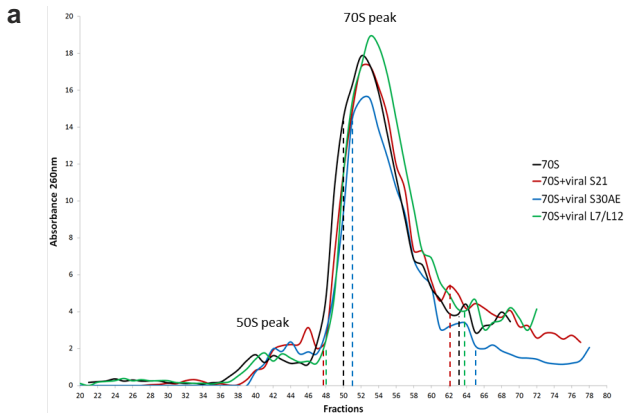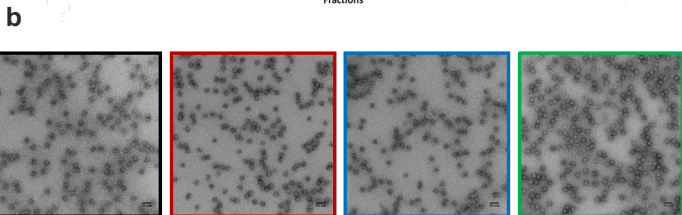

**c**

| Protein, source                            | Accession number | Peptides in 70S sample   | Peptides in cell extract                                           |
|--------------------------------------------|------------------|--------------------------|--------------------------------------------------------------------|
| S21, <i>Pelagibacter</i> phage HTVC008M    | AGE60443         | SITVVVKNNNVE<br>KKLRLKKE | N.D.                                                               |
| S30AE, <i>Escherichia coli</i> phage rv5   | ABI79209         | None                     | GSDAYEATDR<br>VENDHQEVMAFIFDNSGK<br>VENDHQEVM*AFIFDNSGK<br>VKIDFGE |
| L7/L12, <i>Salmonella</i> phage FSL SP-076 | AGF88397         | VNDDTETYIDLPHYVAR        | N.D.                                                               |
